# Supplementary material for: Discovering differential genome sequence activity with interpretable and efficient deep learning
Source: PLoS Comput Biol. 2021 Aug 9;17(8):e1009282. doi: 10.1371/journal.pcbi.1009282 (PMC8376110; doi:10.1371/journal.pcbi.1009282)
Supplement: S2 Table — (XLSX) [file pcbi.1009282.s002.xlsx]

## Sheet: Sheet1
Cell type (ATAC-seq)	Source	Identification
Stem cell ATAC-seq	(De Dieuleveult et al. 2016)	GSE64825
Fibroblast ATAC-seq	(Cheloufi et al. 2015)	GSE66534
Skeletal Muscle ATAC-seq	(Ramachandran et al. 2019)	GSE123879
Cardiomyocyte ATAC-seq	(Quaife-Ryan et al. 2017)	GSE95763
Endoderm ATAC-seq	(Cernilogar et al. 2019)	GSM3223249
Hepatocyte ATAC-seq	ENCODE	ENCSR609OHJ
Pancreatic alpha/beta cell ATAC-seq	(Lawlor et al. 2017)	GSE99954
Dopaminergic Midbrain Neuron ATAC-seq	(McClymont et al. 2018)	GSE122450
Spinal Motor Neuron ATAC-seq	Closser et al. 2021 (in revision)	GSE178466
Table S2. ATAC-seq data used for pre-trained DeepAccess model.
References
1. Cernilogar FM, Hasenoder S, Wang Z, Scheibner K, Burtscher I, Sterr M, Smialowski P, Groh S, Evenroed IM, Gilfillan GD, et al. 2019. Pre-marked chromatin and transcription factor co-binding shape the pioneering activity of Foxa2. Nucleic Acids Res 47: 9069–9086.
2. Cheloufi S, Elling U, Hopfgartner B, Jung YL, Murn J, Ninova M, Hubmann M, Badeaux AI, Ang CE, Tenen D. 2015. The histone chaperone CAF-1 safeguards somatic cell identity. Nature 528: 218–224.
3. De Dieuleveult M, Yen K, Hmitou I, Depaux A, Boussouar F, Dargham DB, Jounier S, Humbertclaude H, Ribierre F, Baulard C. 2016. Genome-wide nucleosome specificity and function of chromatin remodellers in ES cells. Nature 530: 113–116.
4. Lawlor N, Youn A, Kursawe R, Ucar D, Stitzel ML. 2017. Alpha TC1 and Beta-TC-6 genomic profiling uncovers both shared and distinct transcriptional regulatory features with their primary islet counterparts. Sci Rep 7: 1–14.
5. McClymont SA, Hook PW, Soto AI, Reed X, Law WD, Kerans SJ, Waite EL, Briceno NJ, Thole JF, Heckman MG. 2018. Parkinson-associated SNCA enhancer variants revealed by open chromatin in mouse dopamine neurons. Am J Hum Genet 103: 874–892.
6. Quaife-Ryan GA, Sim CB, Ziemann M, Kaspi A, Rafehi H, Ramialison M, El-Osta A, Hudson JE, Porrello ER. 2017. Multicellular transcriptional analysis of mammalian heart regeneration. Circulation 136: 1123–1139.
7. Ramachandran K, Senagolage MD, Sommars MA, Futtner CR, Omura Y, Allred AL, Barish GD. 2019. Dynamic enhancers control skeletal muscle identity and reprogramming. PLoS Biol 17: e3000467.
